# Supplementary material for: One-Step Solution Deposition of Antimony Selenoiodide Films via Precursor Engineering for Lead-Free Solar Cell Applications
Source: MDPI journal article supplement (doi:10.3390/nano11123206), 2021-11-26
Supplement: s1 [file s1]

## Supplementary Material

# One-Step Solution Deposition of Antimony Selenoiodide Films via Precursor Engineering for Lead-Free Solar Cell Applications

Yong Chan Choi \* and Kang-Won Jung

Division of Energy Technology, Daegu Gyeongbuk Institute of Science & Technology (DGIST), Daegu 42988, Korea; kw.jung@dgist.ac.kr

\* Correspondence: ycchoi@dgist.ac.kr

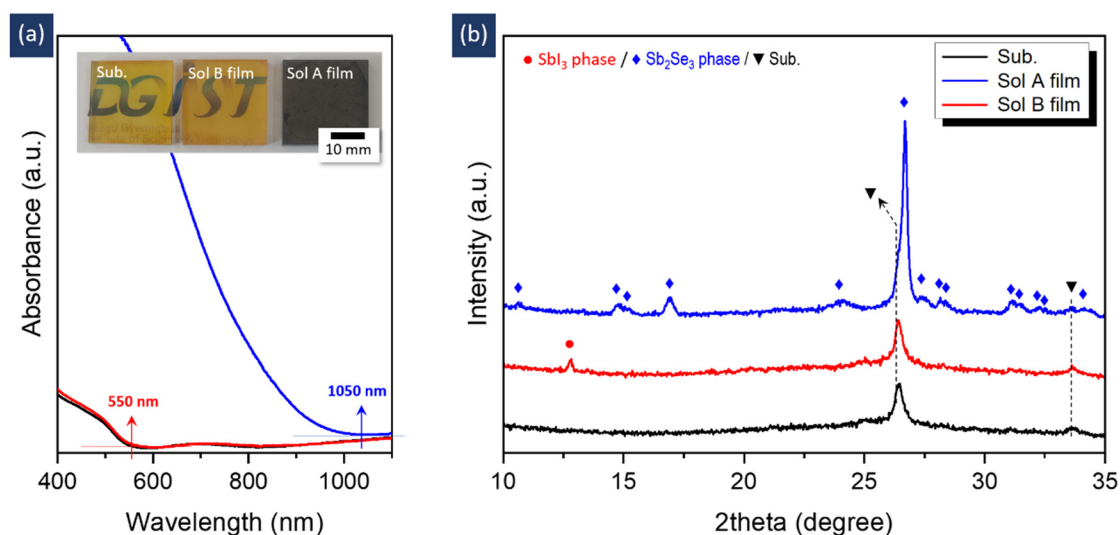

**Figure S1.** (a) Absorption, sample photographs, and (b) XRD patterns of samples fabricated using Sol A (blue lines) and Sol B (blue lines). XRD patterns were indexed based on two references for orthorhombic Sb<sub>2</sub>Se<sub>3</sub> (ICDD #98-065-1519) and monoclinic SbI<sub>3</sub> (ICDD #98-002-6082). “Sub.,” “Sol A film,” and “Sol B film” indicate the CdS/FTO substrate, and films fabricated by Sol A and Sol B, respectively. Note that Sol A and Sol B films were annealed at 150 °C in the glove box.

The Sol A film exhibits an absorption edge of ~ 1050 nm ( $E_G$  of ~1.18 eV), and its XRD pattern matches that of orthorhombic Sb<sub>2</sub>Se<sub>3</sub>. The Sol B film exhibits an absorption edge of ~ 550 nm ( $E_G$  of ~2.25 eV) and SbI<sub>3</sub> phase. These results indicate that the Sb<sub>2</sub>Se<sub>3</sub> and SbI<sub>3</sub> phases were successfully formed using Sol A and Sol B, respectively.

**Table S1.** Quantitative ratio of Sb<sub>2</sub>Se<sub>3</sub> and SbSeI phases, shown in Figure 2b.

| Samples                               | 1:0.75 | 1:1 | 1:1.25 | 1:1.5 | 1:1.75 | 1:2  |
|---------------------------------------|--------|-----|--------|-------|--------|------|
| Sb <sub>2</sub> Se <sub>3</sub> phase | 39%    | 26% | 9%     | 100%  | 100%   | 100% |
| SbSeI phase                           | 61%    | 74% | 91%    | 0     | 0      | 0    |

**Table S2.** Lattice spacings for each phase, obtained from the XRD pattern of the 1:1 sample, shown in Figure 2b.

| 2theta (°) | Phase                           | Lattice plane | Calculated lattice spacing (Å) |
|------------|---------------------------------|---------------|--------------------------------|
| 10.72      | Sb <sub>2</sub> Se <sub>3</sub> | (101)         | 8.24717                        |
| 13.333     | SbSeI                           | (101)         | 6.63528                        |
| 15.035     | Sb <sub>2</sub> Se <sub>3</sub> | (200)         | 5.88775                        |
| 16.876     | Sb <sub>2</sub> Se <sub>3</sub> | (201)         | 5.24947                        |
| 20.07      | SbSeI                           | (102)         | 4.42111                        |
| 20.5133    | SbSeI                           | (200)         | 4.32613                        |
| 22.295     | SbSeI                           | (011)         | 3.98427                        |
| 24.03      | Sb <sub>2</sub> Se <sub>3</sub> | (103)         | 3.70014                        |
| 26.588     | SbSeI                           | (202)         | 3.34987                        |
| 27.461     | Sb <sub>2</sub> Se <sub>3</sub> | (302)         | 3.24538                        |
| 28.18      | Sb <sub>2</sub> Se <sub>3</sub> | (211)         | 3.16407                        |
| 29.549     | SbSeI                           | (112)         | 3.02062                        |
| 31.183     | Sb <sub>2</sub> Se <sub>3</sub> | (212)         | 2.86596                        |
| 32.185     | SbSeI                           | (301)         | 2.77897                        |
| 34.080     | Sb <sub>2</sub> Se <sub>3</sub> | (402)         | 2.62867                        |

**Table S3.** Quantitative ratio of Sb<sub>2</sub>Se<sub>3</sub>, SbSeI, and unknown phases, shown in Figure 3b.

| Samples                               | 150 °C | 200 °C | 250 °C | 300 °C |
|---------------------------------------|--------|--------|--------|--------|
| Sb <sub>2</sub> Se <sub>3</sub> phase | 100%   | 0      | 92%    | 0      |
| SbSeI phase                           | 0      | 93%    | 0      | 0      |
| Unknown phase                         | 0      | 7%     | 8%     | 100%   |

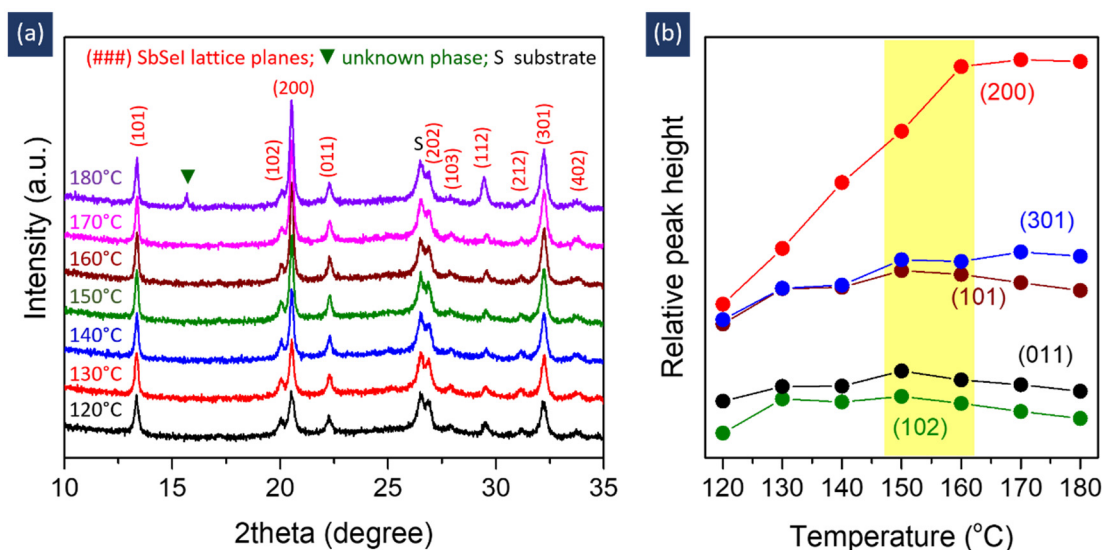

**Figure S2.** (a) XRD patterns of samples fabricated at 120–180 °C and (b) corresponding peak height of typical five SbSeI lattice planes. As the temperature increased to 150 °C, all XRD peaks gradually increased, as shown in Figure S2b. However, further increasing the temperature led to a decrease in the peak height. Whereas, the peak height of (200) plane increased until 160 °C and then saturated. In addition, the unknown phase, related to intermediate Sb-Se-I phase, was observed at a high temperature of 180 °C. These results indicate that 150 and 160 °C, highlighted by a yellow box in (b), are proper to form pure SbSeI film.

**Table S4.** Comparison of five typical XRD peaks of the sample, obtained from the XRD pattern (Figure 4b), with two reference XRD peaks. BiSeI and SbSeI reference data were obtained from ID # mp-23020 (The Materials Project) and ICDD # 98-003-1292, respectively.

| Plane           | (011)<br>or (101) | (012)<br>or (102) | (020) | (021)<br>or (201) | (120)<br>or (210) |
|-----------------|-------------------|-------------------|-------|-------------------|-------------------|
| BiSeI reference | 12.52             | 18.58             | 19.68 | 21.16             | 28.73             |
| Sample          | 13.18             | 19.71             | 20.35 | 22.06             | 29.05             |
| SbSeI reference | 13.27             | 19.89             | 20.43 | 22.17             | 29.77             |

**Table S5.**  $E_{\text{cutoff}}$ ,  $E_{\text{VE}}$ ,  $E_{\text{C}}$ ,  $E_{\text{V}}$ , and  $E_{\text{F}}$  values of SbSI and (Bi,Sb)SeI samples.

| Samples    | $E_{\text{cutoff}}$ (eV) | $E_{\text{VE}}$ (eV) | $E_{\text{C}}$ (eV) | $E_{\text{V}}$ (eV) | $E_{\text{F}}$ (eV) |
|------------|--------------------------|----------------------|---------------------|---------------------|---------------------|
| SbSeI      | 17.05                    | 1.42                 | 3.90                | 5.58                | 4.17                |
| (Bi,Sb)SeI | 16.98                    | 1.42                 | 4.25                | 5.70                | 4.25                |

**Table S6.** Device parameters of various SbSeI solar cells depending on the film fabrication conditions. For device fabrication, Spiro-OMeTAD and Au (~ 70 nm) were sequentially deposited on the surface of SbSeI films as hole transporting layer and electrode, respectively, according to a previously reported procedure [1]. The results showed that the highest efficiency was obtained from the optimized conditions, i.e. 1:1 molar ratio and 150 °C.

| Film fabrication conditions<br>(Molar ratio / annealing temperature) | $J_{\text{sc}}$ (mA · cm <sup>-2</sup> ) | $V_{\text{oc}}$ (mV) | FF (%) | PCE (%) |
|----------------------------------------------------------------------|------------------------------------------|----------------------|--------|---------|
| 1:1 / 150 °C                                                         | 0.15                                     | 372.96               | 42.91  | 0.02    |
| 1:1.25 / 150 °C                                                      | 0.78                                     | 581.03               | 38.39  | 0.17    |
| 1:1.5 / 150 °C                                                       | 0.88                                     | 633.03               | 41.71  | 0.23    |
| 1:1.75 / 150 °C                                                      | 0.68                                     | 620.68               | 40.11  | 0.17    |
| 1:1.5 / 200 °C                                                       | 0.67                                     | 569.25               | 33.79  | 0.13    |
| 1:1.5 / 250 °C                                                       | 0.15                                     | 356.50               | 39.32  | 0.02    |

$J_{\text{sc}}$ : short circuit current density,  $V_{\text{oc}}$ : open-circuit voltage, FF: fill factor, and PCE: power conversion efficiency.

## Reference

- [1] Choi, Y.C.; Lee, S.W.; Kim, D.-H., Antisolvent-assisted powder engineering for controlled growth of hybrid  $\text{CH}_3\text{NH}_3\text{PbI}_3$  perovskite thin films. *APL Mater.* **2020**, *5*, 026101.
